# Supplementary material
Source: PubMed Central journal article supplement (PMC8633913)
Supplement: 41584_2021_718_MOESM1_ESM.pdf [file 41584_2021_718_MOESM1_ESM.pdf]

---

**Supplementary information**

---

**Global epidemiology of vasculitis**

---

In the format provided by the  
authors and unedited

## **Global epidemiology of vasculitis**

Richard A. Watts, Gulen Hatemi, Jane C. Burns & Aladdin J. Mohammad

Supplementary Tables.

**Supplementary Table 1. Incidence of giant cell arteritis.**

| Region               | Study period | Incidence (cases per 100,000 population aged > 50 year unless specified) | Case definition                     | Study type                                                | Reference     |
|----------------------|--------------|--------------------------------------------------------------------------|-------------------------------------|-----------------------------------------------------------|---------------|
| <i>Europe</i>        |              |                                                                          |                                     |                                                           |               |
| Denmark              | 1996-2018    | 22.2                                                                     | ICD-10 codes DM31.5 and DM 31.6)    | Administrative database analysis                          | <sup>1</sup>  |
| Savo, Finland        | 2010         | 7.4 (female 10.6, male 4.9)                                              | ACR 1990 criteria                   | Population Survey                                         | <sup>2</sup>  |
| France               | 2007-2015    | 10.0                                                                     | ICD-10 codes (DM31.5 and DM 31.6)   | Administrative insurance database analysis, retrospective | <sup>3</sup>  |
| Germany              | 1998-2002    | 3.2                                                                      | CHCC 1994                           | Prospective population survey                             | <sup>4</sup>  |
| Reykjavik, Iceland   | 1967-2008    | 43.6                                                                     | Biopsy positive                     | Population based cohort study                             | <sup>5</sup>  |
| Jerusalem, Israel    | 1990-2009    | 8.1 (Jewish population)                                                  | ACR 1990 criteria /CHCC 2012        | Hospital based retrospective, ACR or CHCC                 | <sup>6</sup>  |
| Reggio Emilia, Italy | 1986-2012    | 5.8 (females 7.8, males 3.3)                                             | Biopsy positive                     | Analysis pathology database                               | <sup>7</sup>  |
| Southern Norway      | 2000-2013    | 16.8 (females 24.5, males 10.2)                                          | ACR 1990 criteria/Biopsy/imaging    | Hospital data base analysis using ICD DM31.5 and DM 31.6  | <sup>8</sup>  |
| Slovenia             | 2012-2017    | 8.7 (females 120.6, males 6.4)                                           | ACR 1990 criteria & biopsy positive | Prospective population based                              | <sup>9</sup>  |
| Spain                | 1981-2005    | 10.1 (females 10.2, males 9.9)                                           | Biopsy positive                     | Retrospective case note review                            | <sup>10</sup> |

|                      |           |                                                                            |                                                                                                                    |                                                 |               |
|----------------------|-----------|----------------------------------------------------------------------------|--------------------------------------------------------------------------------------------------------------------|-------------------------------------------------|---------------|
| Sweden               | 1997-2019 | 13.3 (females 17.8, males 8.2)                                             | Biopsy positive                                                                                                    | Analysis pathology database                     | <sup>11</sup> |
| Turkey               | 2003-2009 | 1.1 (females 1.14, males 1.1)                                              | ACR 1990 criteria                                                                                                  | Hospital based                                  | <sup>12</sup> |
| United Kingdom       | 2000-2011 | 10.0 (females 15, males 6.0)                                               | Read codes (G75500, G755.00, G755z00, N200.00, G755100), age >50 years, steroids within 6 months of registry entry | Analysis clinical population database (UK CPRD) | <sup>13</sup> |
| <i>North America</i> |           |                                                                            |                                                                                                                    |                                                 |               |
| Olmsted county, USA  | 2000-2009 | 19.8 (females 27.0, males 10.1)                                            | ACR 1990 criteria                                                                                                  | Population based cohort                         | <sup>14</sup> |
| Saskatoon, Canada    | 1998-2003 | 9.4 (including Europeans and Indigenous)<br>7.7 Europeans<br>16 Indigenous | Biopsy positive                                                                                                    | Analysis neuro-ophthalmology database           | <sup>15</sup> |
| <i>Australasia</i>   |           |                                                                            |                                                                                                                    |                                                 |               |
| South Australia      | 1992-2011 | 3.2 (females 4.3, males 1.9)                                               | Biopsy positive                                                                                                    | Analysis pathology database                     | <sup>16</sup> |
| Otago, New Zealand   | 1996-2005 | 12.7                                                                       | Biopsy positive                                                                                                    | Analysis pathology database                     | <sup>17</sup> |

ACR – American College Rheumatology, CHCC – Chapel Hill Consensus Conference, ICD – International Classification of Diseases  
ACR 1990 criteria for GCA<sup>18</sup>; CHCC 1994<sup>19</sup>

**Supplementary Table 2. Incidence of Kawasaki disease.**

| Region          | Study period | Incidence (cases per 100,000 population aged > 5 year unless specified) | Case definition                                | Study type                                    | Reference     |
|-----------------|--------------|-------------------------------------------------------------------------|------------------------------------------------|-----------------------------------------------|---------------|
| <i>Europe</i>   |              |                                                                         |                                                |                                               |               |
| Czech Republic  | 1997-1999    | 1.6                                                                     | AHA                                            | Hospital surveillance                         | <sup>20</sup> |
| Denmark         | 1981-2004    | 4.9                                                                     | Clinical                                       | Analysis hospital discharge records           | <sup>21</sup> |
| Finland         | 1999-2009    | 11.4                                                                    | ICD 9 code 446B or 446.98 or ICD 10 code M30.3 | Analysis hospital discharge database          | <sup>22</sup> |
| Northern France | 2005-2006    | 9.0                                                                     | AHA                                            | Cohort study                                  | <sup>23</sup> |
| Germany         | 2011-2012    | 7.2                                                                     | AHA                                            | Nationwide surveillance                       | <sup>24</sup> |
| Georgia         | 1997-1998    | 9.8                                                                     | CDC                                            | National hospital discharge database          | <sup>25</sup> |
| Greece          | 2001-2010    | 3.2                                                                     | AHA                                            | Hospital discharge database analysis          | <sup>26</sup> |
| Ireland         | 1996-2000    | 15.2                                                                    | Clinical                                       | National hospital discharge analysis          | <sup>27</sup> |
| Israel          | 1996-2009    | 6.4                                                                     | ICD9 446.1                                     | Analysis national hospital discharge register | <sup>28</sup> |
| Italy           | 2008-2013    | 17.6                                                                    | ICD9 446.1                                     | Regional hospital discharge database analysis | <sup>29</sup> |

|                    |           |      |                                                |                                               |               |
|--------------------|-----------|------|------------------------------------------------|-----------------------------------------------|---------------|
| Norway             | 1999-2009 | 5.4  | ICD 9 code 446B or 446.98 or ICD 10 code M30.3 | Analysis hospital discharge database          | <sup>22</sup> |
| Spain              | 2005-2015 | 11.7 | ICD -9 446.1                                   | Analysis of hospital morbidity survey         | <sup>30</sup> |
| Sweden             | 1999-2009 | 7.4  | ICD 9 code 446B or 446.98 or ICD 10 code M30.3 | Analysis hospital discharge database          | <sup>22</sup> |
| The Netherlands    | 2008-2012 | 5.8  | Clinical                                       | Prospective surveillance                      | <sup>31</sup> |
| United Kingdom     | 2014-2015 | 4.5  | AHA                                            | Population surveillance                       | <sup>32</sup> |
| <i>Americas</i>    |           |      |                                                |                                               |               |
| Ontario, Canada    | 2000-2014 | 19.6 | Discharge diagnosis                            | Analysis National hospital discharge database | <sup>33</sup> |
| USA                | 2018      | 19.8 | ICD-CM                                         | Analysis administrative database              | <sup>34</sup> |
| Panama             | 2009-2013 | 2.1  | AHA 2004                                       | Retrospective review national                 | <sup>35</sup> |
| <i>Australasia</i> |           |      |                                                |                                               |               |
| Australia          | 2000-2009 | 9.3  | AHA                                            | Analysis discharge database                   | <sup>36</sup> |
| New Zealand        | 2001-2002 | 8.0  | AHA                                            | National surveillance                         | <sup>37</sup> |
| <i>Asia</i>        |           |      |                                                |                                               |               |
| China              | 2000-2004 | 55   | Clinical                                       | Hospital based survey                         | <sup>38</sup> |
| Hong Kong          | 2000-2011 | 74   | AHA                                            |                                               | <sup>39</sup> |
| India              | 1994-2008 | 5.35 | AHA                                            | Hospital database analysis                    | <sup>40</sup> |
| Japan              | 2017-2018 | 359  | Japanese guidelines                            | Nationwide survey                             | <sup>41</sup> |

|             |           |      |               |                                                       |               |
|-------------|-----------|------|---------------|-------------------------------------------------------|---------------|
| South Korea | 2015-2017 | 197  | Clinical      | Population survey                                     | <sup>42</sup> |
| Taiwan      | 1996-2011 | 45.2 | ICD-9-CM 4461 | Nationwide retrospective. Analysis insurance database | <sup>43</sup> |
| Thailand    | 1998-2002 | 3.4  | AHA           | National registry                                     | <sup>44</sup> |
| Malaysia    | 2006-2009 | 14.8 | AHA           | Population                                            | <sup>45</sup> |

AHA = American Heart Association<sup>46</sup>

**Supplementary Table 3. Incidence of ANCA-associated vasculitis (AAV).**

| Region             | Study Period | Incidence (cases per million population) |      |      | Case Definition                                       | Study type                         | Reference     |
|--------------------|--------------|------------------------------------------|------|------|-------------------------------------------------------|------------------------------------|---------------|
|                    |              | GPA                                      | MPA  | EGPA |                                                       |                                    |               |
| <i>Europe</i>      |              |                                          |      |      |                                                       |                                    |               |
| Nottingham, UK     | 2007–2013    | 8.2                                      | 13.4 | 1.5  | EMA                                                   | Population register                | <sup>47</sup> |
| Tromso, Norway     | 1999–2013    | 15.6                                     | 10.4 | 2.7  | EMA                                                   | Population register                | <sup>48</sup> |
| Lund, South Sweden | 1997–2006    | 9.8                                      | 10.1 | 0.9  | EMA                                                   | Population register                | <sup>49</sup> |
| Finland            | 1996–2000    | 9.3                                      | NA   | NA   | GPA ACR 1990                                          | Analysis national discharge data   | <sup>50</sup> |
| Germany            | 2013–2016    | 34.0                                     | 13.0 | NA   | GPA ICD-10 M31.3<br>MPA ICD-10 M31.7                  | Analysis insurance claims database | <sup>51</sup> |
| Vilnius, Lithuania | 1990–1999    | 2.1                                      | 3    | 1.3  | GPA ACR 1990<br>MPA ACR 1990 for PAN<br>EGPA ACR 1990 | Analysis hospital database         | <sup>52</sup> |
| Crete, Greece      | 1995–2003    | 6.6                                      | 10.2 | NA   | GPA ACR 1990<br>MPA CHCC 1994                         | Analysis hospital records          | <sup>53</sup> |
| Malaga, Spain      | 1994–2010    | 2.1                                      | 3.4  | 0.64 | GPA ACR 1990                                          | Retrospective population           | <sup>54</sup> |



|                                                            |               |                            |     |     |                                                         |                                                                  |               |
|------------------------------------------------------------|---------------|----------------------------|-----|-----|---------------------------------------------------------|------------------------------------------------------------------|---------------|
|                                                            |               |                            |     |     | MPA CHCC<br>1994<br>EGPA ACR<br>1990                    |                                                                  |               |
| Reggio Emilia, Italy                                       | 2004–<br>2009 | 3.4                        | NA  | NA  | ACR                                                     | Analysis<br>hospital<br>discharge<br>database                    | <sup>7</sup>  |
| Faroes (Danes)                                             | 1992–<br>2011 | 6.4 (Danes)<br>1.0 (Inuit) | NA  | NA  | GPA ACR<br>1990                                         | Analysis<br>national<br>hospital<br>register                     | <sup>55</sup> |
| Burgundy, France                                           | 1998–<br>2008 | NA                         | NA  | 1.2 | EGPA ACR<br>1990                                        | Analysis<br>hospital<br>discharge<br>database                    | <sup>56</sup> |
| Edirne, Turkey                                             | 2004–<br>2014 | 4.8                        | 2.4 | 0.8 | GPA ACR<br>1990<br>MPA CHCC<br>1994<br>EGPA ACR<br>1990 | Retrospective<br>analysis<br>hospital<br>database                | <sup>57</sup> |
| Jerusalem (Jewish population—<br>hospital inpatients only) | 1990–<br>2009 | 4.1                        | 2.3 | 1.2 | GPA ACR<br>1990<br>MPA CHCC<br>1994<br>EGPA ACR<br>1990 | Analysis of<br>hospital<br>records. Jewish<br>population<br>only | <sup>6</sup>  |
| Poland                                                     | 2008–<br>2013 | NA                         | NA  | 1.5 | ICD-10                                                  | Analysis<br>national<br>hospital<br>discharge<br>database        | <sup>58</sup> |

|                                        |           |      |      |      |                                                 |                                               |               |
|----------------------------------------|-----------|------|------|------|-------------------------------------------------|-----------------------------------------------|---------------|
| Poland                                 | 2011-2015 | 7.7  | NA   | NA   | ICD-10                                          | Analysis national hospital discharge database | <sup>58</sup> |
| <i>Americas</i>                        |           |      |      |      |                                                 |                                               |               |
| Olmsted County, USA                    | 1996-2015 | 13.0 | 16.0 | 4.0  | GPA ACR 1990-<br>MPA CHCC 2012<br>EGPA ACR 1990 | Population register                           | <sup>59</sup> |
| Saskatchewan, Canada <sup>†</sup>      | 2007–2011 | 4.6  | 7.1  | NA   | GPA ACR 1990<br>MPA CHCC 1994                   | Analysis hospital database                    | <sup>60</sup> |
| Lima, Peru                             | 1990–2004 | 0.5  | 4    | 0.14 | CHCC                                            | Hospital based population                     | <sup>61</sup> |
| Argentina                              | 2000-2015 | 9    | 14   | NA   | GPA ACR 1990<br>MPA CHCC 2012                   | Analysis insurance database                   | <sup>62</sup> |
| <i>Australasia</i>                     |           |      |      |      |                                                 |                                               |               |
| Capital Territory, + SE NSW, Australia | 2000–2004 | 8.4  | 5.0  | 2.2  | GPA ACR 1990<br>MPA CHCC 1994<br>ACR 1990       | Analysis hospital inpatient database          | <sup>63</sup> |
| New Zealand                            | 1999–2003 | 10.4 | NA   | NA   | ICD 10 M301, M313                               | National hospital database                    | <sup>64</sup> |
| <i>Asia</i>                            |           |      |      |      |                                                 |                                               |               |

|                    |               |      |      |    |                                     |                                                      |               |
|--------------------|---------------|------|------|----|-------------------------------------|------------------------------------------------------|---------------|
| Japan              | 2005–<br>2009 | 2.1  | 18.2 | NA | GPA ACR<br>1990<br>MPA CHCC<br>1994 | Population<br>register                               | <sup>65</sup> |
| Taiwan             | 1997–<br>2008 | 0.37 | NA   | NA | GPA ICD-9<br>446.4                  | Analysis<br>national health<br>insurance<br>database | <sup>66</sup> |
| <i>Middle East</i> |               |      |      |    |                                     |                                                      |               |
| Kuwait             | 1993–<br>1996 | NA   | 24.0 | NA | MPA CHCC<br>1994                    |                                                      | <sup>67</sup> |

<sup>†</sup>Renal involvement only; reported annual incidence of granulomatosis with polyangiitis (Wegener's) and microscopic polyangiitis. *ACR*, American College of Rheumatology criteria (1990); *CHCC*, Chapel Hill Consensus Conference definition (1994); *EGPA*, eosinophilic granulomatosis with polyangiitis; *EMA*, European Medicines Agency Algorithm; *GN*, glomerulonephritis; *GPA*, granulomatosis with polyangiitis; *ICD*, International Classification of Diseases; *MPA*, microscopic polyangiitis; *NA*, not available; *UKGPRD*, United Kingdom General Practice Research Database. ACR 1990 criteria for GPA<sup>68</sup>, ACR 1990 criteria for EGPA<sup>69</sup>, CHCC 1994 definitions<sup>19</sup>, CHCC 2012 definitions<sup>70</sup>

**Supplementary Table 4. Prevalence of Behcet syndrome.**

| <b>Region</b>          | <b>Study period</b> | <b>Prevalence (cases per 100,000 population)</b> | <b>Case definition</b> | <b>Study type</b>                         | <b>Reference</b> |
|------------------------|---------------------|--------------------------------------------------|------------------------|-------------------------------------------|------------------|
| <i>Europe</i>          |                     |                                                  |                        |                                           |                  |
| Paris, France          | 2003                | 7.1                                              | ISG 1990               | Population                                | <sup>71</sup>    |
| Germany                | 2012                | 1.5                                              | ISG 2014               | Analysis national registry                | <sup>72</sup>    |
| Mid-west, Ireland      | 2017                | 6.2                                              | ISG 2014               | Cohort study                              | <sup>73</sup>    |
| Italy                  | 2010                | 15.9                                             | ISG 1990               | Cross sectional                           | <sup>74</sup>    |
| Rotterdam, Netherlands | 2012                | 7.6                                              | ISG 1990               | Analysis hospital database                | <sup>75</sup>    |
| Poland                 | 2014                | 0.34                                             | ICD-10                 | Analysis national administrative database | <sup>76</sup>    |
| Portugal               | 1997                | 2.4                                              | NA                     | Cohort study                              | <sup>77</sup>    |
| Spain                  | 1988-1997           | 0.66                                             | ISG 1990               | Cohort study                              | <sup>78</sup>    |
| Southern Sweden        | 2011                | 4.9                                              | ISG 1990               | Population                                | <sup>79</sup>    |
| Switzerland            | Not stated          | 4.0                                              | ISGBD 2014             | Cohort study                              | <sup>80</sup>    |
| United Kingdom         | 1995-2017           | 14.6                                             | Read codes             | National clinical database primary care   | <sup>81</sup>    |
| <i>Middle East</i>     |                     |                                                  |                        |                                           |                  |
| Egypt                  | 2017                | 3.6                                              | ISGBD 2014             | Cross sectional                           | <sup>82</sup>    |
| Iraq                   | 1999-2000           | 17                                               | ISG 1990               | Cross sectional survey                    | <sup>83</sup>    |
| Kurdistan, Iran        | 2011-2012           | 100                                              | ISG 1990               | Cross sectional population survey         | <sup>84</sup>    |
| Israel                 | Not stated          | 120                                              | ISG 1990               | Population                                | <sup>85</sup>    |
| Jordan                 | Not stated          | 660                                              | ISG                    | Cross sectional hospital workers          | <sup>86</sup>    |
| Kuwait                 | N/A                 | 2.1                                              | N/A                    | Cohort study                              | <sup>87</sup>    |

|                    |            |      |                               |                                      |               |
|--------------------|------------|------|-------------------------------|--------------------------------------|---------------|
| Lebanon            | 2007       | 100  | ISG 1990                      | Cross sectional population survey    | <sup>88</sup> |
| Saudi Arabia       | 1979-1992  | 20   | ISG 1990                      | Cohort study                         | <sup>89</sup> |
| Istanbul, Turkey   | Not stated | 421  | ISG 1990                      | Cross sectional population           | <sup>90</sup> |
| <i>Americas</i>    |            |      |                               |                                      |               |
| Brazil             | 2006-2007  | 0.3  | ISG 1990                      | Cross sectional hospital             | <sup>91</sup> |
| Colombia           | 2012-2016  | 1.1  | ICD-10 code: M352             | Analysis administrative database     | <sup>92</sup> |
| South western, USA | Not stated | 10.6 | ISG 1990                      | Cross sectional hospital database    | <sup>93</sup> |
| <i>Asia</i>        |            |      |                               |                                      |               |
| China              | Not stated | 10   | ISG 1990                      | Cross sectional population survey    | <sup>94</sup> |
| Japan              | Not stated | 13.5 | Not stated                    | Not stated                           | <sup>95</sup> |
| Mongolia           | 2015-2019  | 2.4  | ISG 1990                      | Cross sectional                      | <sup>96</sup> |
| Korea              | 2011-2017  | 15.1 | Korean Disease Classification | Analysis insurance database          | <sup>97</sup> |
| Taiwan             | 2000       | 1.4  | ICD-9-CM 136.1                | Analysis national insurance database | <sup>98</sup> |

ISG = International study group 1990

1. Therkildsen, P. *et al.* Giant cell arteritis: A nationwide, population-based cohort study on incidence, diagnostic imaging, and glucocorticoid treatment. *Semin. Arthritis Rheum.* **51**, 360–366 (2021).
2. Elfving, P. *et al.* Estimating the incidence of connective tissue diseases and vasculitides in a defined population in Northern Savo area in 2010. *Rheumatol. Int.* **36**, 917–924 (2016).
3. Mahr, A. *et al.* Characteristics and management of giant cell arteritis in France: a study based on national health insurance claims data. *Rheumatology* **59**, 120–128 (2020).
4. Reinhold-Keller, E., Herlyn, K., Wagner-Bastmeyer, R. & Gross, W. L. Stable incidence of primary systemic vasculitides over five years: results from the German vasculitis register. *Arthritis Rheum.* **53**, 93–99 (2005).
5. Tomasson, G., Bjornsson, J., Zhang, Y., Gudnason, V. & Merkel, P. A. Cardiovascular risk factors and incident giant cell arteritis: a population-based cohort study. *Scand. J. Rheumatol.* **48**, 213–217 (2019).
6. Neshar, G., Ben-Chetrit, E., Mazal, B. & Breuer, G. S. The Incidence of Primary Systemic Vasculitis in Jerusalem: A 20-year Hospital-based Retrospective Study. *J. Rheumatol.* **43**, 1072–1077 (2016).
7. Catanaso, M. *et al.* Epidemiology of granulomatosis with polyangiitis (Wegner’s granulomatosis) in Northern Italy: a 15-year population based study. *Semin. Arthritis Rheum.* **44**, 202–207 (2014).
8. Andersen, J. B., Myklebust, G., Haugeberg, G., Pripp, A. H. & Diamantopoulos, A. P. Incidence Trends and Mortality of Giant Cell Arteritis in Southern Norway. *Arthritis Care Res.* **73**, 409–414 (2021).
9. Pucelj, N. P. *et al.* The incidence of giant cell arteritis in Slovenia. *Clin. Rheumatol.* **38**, 285–290 (2019).
10. Gonzalez-Gay, M. a *et al.* Giant cell arteritis in northwestern Spain: a 25-year epidemiologic study. *Medicine* **86**, 61–68 (2007).
11. Stamatis, P., Turkiewicz, A., Englund, M., Turesson, C. & Mohammad, A. J. Epidemiology of biopsy-confirmed giant cell arteritis in southern Sweden - an update on incidence and first prevalence estimate. *Rheumatology* <https://doi.org/10.1093/rheumatology/keab269> (2021).
12. Pamuk, O. N., Dönmez, S., Karahan, B., Pamuk, G. E. & Cakir, N. Giant cell arteritis and polymyalgia rheumatica in northwestern Turkey: Clinical features and epidemiological data. *Clin. Exp. Rheumatol.* **27**, 830–833 (2009).
13. Petri, H., Nevitt, A., Sarsour, K., Napalkov, P. & Collinson, N. Incidence of giant cell arteritis and characteristics of patients: Data-driven analysis of comorbidities. *Arthritis Care Res.* **67**, 390–395 (2015).
14. Chandran, A., Udayakumar, P., Crowson, C., Warrington, K. & Matteson, E. The incidence of giant cell arteritis in Olmsted County, Minnesota, over a 60-year period 1950–2009. *Scand. J. Rheumatol.* **44**, 215–218 (2015).
15. Ramstead, C. & Patel, A. Giant cell arteritis in a neuro-ophthalmology clinic in Saskatoon, 1998–2003. *Can. J. Ophthalmol.* **42**, 295–298 (2007).
16. Dunstan, E. *et al.* Epidemiology of biopsy-proven giant cell arteritis in South Australia. *Intern. Med. J.* **44**, 32–39 (2014).
17. Abdul-Rahman, A. M., Molteno, A. C. B. & Bevin, T. H. The epidemiology of giant cell arteritis in Otago, New Zealand: a 9-year analysis. *N. Z. Med. J.* **124**, 44–52 (2011).
18. Hunder, G. G. *et al.* The American College of Rheumatology 1990 criteria for the classification of giant cell arteritis. *Arthritis Rheum.* **33**, 1122–1128 (1990).
19. Jennette, J. C. *et al.* Nomenclature of systemic vasculitides. Proposal of an international consensus conference. *Arthritis Rheum.* **37**, 187–192 (1994).

20. Dolezalová, P., Telekesová, P., Nemcová, D. & Hoza, J. Incidence of vasculitis in children in the Czech Republic: 2-year prospective epidemiology survey. *J. Rheumatol.* **31**, 2295–2299 (2004).
21. Fischer, T. K. *et al.* Kawasaki syndrome in Denmark. *Pediatr. Infect. Dis. J.* **26**, 411–415 (2007).
22. Salo, E. *et al.* Incidence of Kawasaki disease in northern European countries. *Pediatr. Int.* **54**, 770–772 (2012).
23. Heuclin, T. *et al.* Increased Detection Rate of Kawasaki Disease Using New Diagnostic Algorithm, Including Early Use of Echocardiography. *J. Pediatr.* **155**, 695-699.e1 (2009).
24. Jakob, A. *et al.* Kawasaki Disease in Germany. *Pediatr. Infect. Dis. J.* **35**, 129–134 (2016).
25. Gibbons, R. V *et al.* An evaluation of hospitalizations for Kawasaki syndrome in Georgia. *Arch. Pediatr. Adolesc. Med.* **156**, 492–496 (2002).
26. Giannouli, G. *et al.* Epidemiology and Risk Factors for Coronary Artery Abnormalities in Children With Complete and Incomplete Kawasaki Disease During a 10-Year Period. *Pediatr. Cardiol.* **34**, 1476–1481 (2013).
27. Lynch, M., Holman, R. C., Mulligan, A., Belay, E. D. & Schonberger, L. B. Kawasaki syndrome hospitalizations in Ireland, 1996 through 2000. *Pediatr. Infect. Dis. J.* **22**, 959–962 (2003).
28. Bar-Meir, M., Haklai, Z. & Dor, M. Kawasaki disease in Israel. *Pediatr. Infect. Dis. J.* **30**, 589–592 (2011).
29. Mauro, A. *et al.* Kawasaki disease: an epidemiological study in central Italy. *Pediatr. Rheumatol.* **14**, 22 (2016).
30. Riancho-Zarrabeitia, L., Rasilla, D. F., Royé, D., Fdez-Arroyabe, P. & Santurtún, A. Kawasaki disease in Spanish paediatric population and synoptic weather types: an observational study. *Rheumatol. Int.* **38**, 1259–1266 (2018).
31. Tacke, C. E. *et al.* Five Years of Kawasaki Disease in the Netherlands. *Pediatr. Infect. Dis. J.* **33**, 793–797 (2014).
32. Tulloh, R. M. R. *et al.* Kawasaki disease: a prospective population survey in the UK and Ireland from 2013 to 2015. *Arch. Dis. Child.* **104**, 640–646 (2019).
33. Manlhiot, C. *et al.* Epidemiology of Kawasaki Disease in Canada 2004 to 2014: Comparison of Surveillance Using Administrative Data vs Periodic Medical Record Review. *Can. J. Cardiol.* **34**, 303–309 (2018).
34. Maddox, R. A. *et al.* Kawasaki Disease and Kawasaki Disease Shock Syndrome Hospitalization Rates in the United States, 2006-2018. *Pediatr. Infect. Dis. J.* **40**, 284–288 (2021).
35. Estripeaut, D. *et al.* [Multicenter retrospective study about the epidemiological, clinical and therapeutic aspects of Kawasaki disease in children from Panama]. *Rev. Chilena Infectol.* **37**, 675–682 (2020).
36. Saundankar, J. *et al.* The epidemiology and clinical features of Kawasaki disease in Australia. *Pediatrics* **133**, e1009-1014 (2014).
37. Heaton, P. *et al.* Kawasaki disease in New Zealand. *J. Paediatr. Child Health* **42**, 184–190 (2006).
38. Du, Z.-D. *et al.* Epidemiologic study on Kawasaki disease in Beijing from 2000 through 2004. *Pediatr. Infect. Dis. J.* **26**, 449–451 (2007).
39. Cheung, Y. Kawasaki disease in Hong Kong, 2000–2011. *Pediatr Int* **54 (Suppl 1)**, 42–43 (2012).
40. Singh, S. & Bhattad, S. Kawasaki disease incidence at Chandigarh, North India, during 2009–2014. *Rheumatol. Int.* **36**, 1391–1397 (2016).
41. Ae, R. *et al.* Epidemiology, Treatments, and Cardiac Complications in Patients with Kawasaki Disease: The Nationwide Survey in Japan, 2017-2018. *J. Pediatr.* **225**, 23-29.e2 (2020).
42. Kim, G. *et al.* Epidemiology of Kawasaki Disease in South Korea: A Nationwide Survey 2015-2017. *Pediatr. Infect. Dis. J.* **39**, 1012-1016 (2020).

43. Huang, Y.-H. *et al.* Increased Incidence of Kawasaki Disease in Taiwan in Recent Years: A 15 Years Nationwide Population-Based Cohort Study. *Front. Pediatr.* **7**, 121 (2019).
44. Durongpisitkul, K. *et al.* Epidemiologic study of Kawasaki disease and cases resistant to IVIG therapy in Thailand. *Asian Pacific J. Allergy Immunol.* **24**, 27–32 (2006).
45. Mat Bah, M. N. *et al.* Epidemiology, clinical characteristics, and immediate outcome of Kawasaki disease: a population-based study from a tropical country. *Eur. J. Pediatr.* **180**, 2599–2606 (2021).
46. McCrindle, B. W. *et al.* Diagnosis, Treatment, and Long-Term Management of Kawasaki Disease: A Scientific Statement for Health Professionals From the American Heart Association. *Circulation* **135**, e927-999 (2017).
47. Pearce, F. A. *et al.* Incidence of ANCA-associated vasculitis in a UK mixed ethnicity population. *Rheumatology* **55**, 1656–1663 (2016).
48. Nilsen, A. T. *et al.* Increasing incidence and prevalence of ANCA-associated vasculitis in Northern Norway. *Rheumatology* **59**, 2316–2324 (2020).
49. Mohammad, A. J., Jacobsson, L. T. H., Westman, K. W. A., Sturfelt, G. & Segelmark, M. Incidence and survival rates in Wegener’s granulomatosis, microscopic polyangiitis, Churg-Strauss syndrome and polyarteritis nodosa. *Rheumatology* **48**, 1560–1565 (2009).
50. Takala, J. H., Kautiainen, H., Malmberg, H. & Leirisalo-Repo, M. Incidence of Wegener’s granulomatosis in Finland 1981-2000. *Clin. Exp. Rheumatol.* **26**, S81-85 (2008).
51. Hellmich, B. *et al.* New insights into the epidemiology of ANCA-associated vasculitides in Germany: results from a claims data study. *Rheumatology* **60**, 4868-4873 (2021).
52. Dadoniene, J., Kirdaite, G., Mackiewicz, Z., Rimkevicius, A. & Haugeberg, G. Incidence of primary systemic vasculitides in Vilnius: a university hospital population based study. *Ann. Rheum. Dis.* **64**, 335–336 (2005).
53. Panagiotakis, S. H. *et al.* The epidemiology of primary systemic vasculitides involving small vessels in Crete (southern Greece): a comparison of older versus younger adult patients. *Clin. Exp. Rheumatol.* **27**, 409–415 (2009).
54. Romero-Gómez, C. *et al.* Epidemiological study of primary systemic vasculitides among adults in Southern Spain and review of the main epidemiological studies. *Clin. Exp. Rheumatol.* **33 (2 Suppl 89)**, S11-18 (2014).
55. Faurschou, M., Helleberg, M., Obel, N. & Baslund, B. Incidence of granulomatosis with polyangiitis (Wegener’s) in Greenland and the Faroe Islands: epidemiology of an ANCA-associated vasculitic syndrome in two ethnically distinct populations in the North Atlantic area. *Clin. Exp. Rheumatol.* **31**, S52-55 (2013).
56. Vinit, J. *et al.* Churg-Strauss syndrome: retrospective study in Burgundian population in France in past 10 years. *Rheumatol. Int.* **31**, 587–593 (2011).
57. Pamuk, Ö. N., Dönmez, S., Calayır, G. B. & Pamuk, G. E. The epidemiology of antineutrophil cytoplasmic antibody-associated vasculitis in northwestern Turkey. *Clin. Rheumatol.* **35**, 2063-2071 (2016).
58. Kanecki, K. *et al.* Epidemiology of granulomatosis with polyangiitis in Poland, 2011–2015. in *Advances in Experimental Medicine and Biology* **1116**, 131–138 (Springer New York LLC, 2018).
59. Berti, A., Cornec, D., Crowson, C. S., Specks, U. & Matteson, E. L. The Epidemiology of Antineutrophil Cytoplasmic Autoantibody-Associated Vasculitis in Olmsted County, Minnesota: A Twenty-Year US Population-Based Study. *Arthritis Rheumatol.* **69**, 2338–2350 (2017).
60. Anderson, K., Klassen, J., Stewart, S. A. & Taylor-Gjevre, R. M. Does geographic location affect incidence of ANCA-associated renal vasculitis in



northern Saskatchewan, Canada? *Rheumatology* **52**, 1840–1844 (2013).

61. Sanchez, A. A., Acevedo, E. M. & Sanchez, C. G. Evaluation of epidemiology of the primary systemic vasculitides in a Latin-American well-defined population. *Arthritis Rheum.* **54 (Suppl 1)**, S757 (2006).
62. Pierini, F. S., Scolnik, M., Scaglioni, V., Mollerach, F. & Soriano, E. R. Incidence and prevalence of granulomatosis with polyangiitis and microscopic polyangiitis in health management organization in Argentina: a 15-year study. *Clin. Rheumatol.* **38**, 1935–1940 (2019).
63. Ormerod, A. S. & Cook, M. C. Epidemiology of primary systemic vasculitis in the Australian Capital Territory and south-eastern New South Wales. *Intern. Med. J.* **38**, 816–823 (2008).
64. O'Donnell, J. L., Stevanovic, V. R., Frampton, C., Stamp, L. K. & Chapman, P. T. Wegener's granulomatosis in New Zealand: evidence for a latitude-dependent incidence gradient. *Intern. Med. J.* **37**, 242–246 (2007).
65. Fujimoto, S. *et al.* Comparison of the epidemiology of anti-neutrophil cytoplasmic antibody-associated vasculitis between Japan and the U.K. *Rheumatology* **50**, 1916–1920 (2011).
66. Wu, C.-S., Hsieh, C.-J., Peng, Y.-S., Chang, T.-H. & Wu, Z.-Y. Antineutrophil cytoplasmic antibody-associated vasculitis in Taiwan: A hospital-based study with reference to the population-based National Health Insurance database. *J. Microbiol. Immunol. Infect.* **48**, 477–482 (2014).
67. el-Reshaid, K., Kapoor, M. M., El-Reshaid, W., Madda, J. P. & Varro, J. The spectrum of renal disease associated with microscopic polyangiitis and classic polyarteritis nodosa in Kuwait. *Nephrol. Dial. Transplant.* **12**, 1874–1882 (1997).
68. Leavitt, R. Y. *et al.* The American College of Rheumatology 1990 criteria for the classification of Wegener's granulomatosis. *Arthritis Rheum.* **33**, 1101–1107 (1990).
69. Masi, A. T. *et al.* The American College of Rheumatology 1990 criteria for the classification of Churg-Strauss syndrome (allergic granulomatosis and angiitis). *Arthritis Rheum.* **33**, 1094–1100 (1990).
70. Jennette, J. *et al.* 2012 Revised International Chapel Hill Consensus Conference Nomenclature of Vasculitides. *Arthritis Rheum.* **65**, 1–11 (2013).
71. Mahr, A. *et al.* Population-based prevalence study of Behçet's disease: differences by ethnic origin and low variation by age at immigration. *Arthritis Rheum.* **58**, 3951–3959 (2008).
72. Bonitsis, N. G. *et al.* Gender-specific differences in Adamantiades-Behçet's disease manifestations: an analysis of the German registry and meta-analysis of data from the literature. *Rheumatology* **54**, 121–133 (2015).
73. Adeeb, F., Stack, A. G. & Fraser, A. D. New insights into Behçet's disease in Ireland: the Midwest cohort study. *Clin. Exp. Rheumatol.* **36**, 33–39 (2018).
74. Olivieri, I. *et al.* High prevalence of Behçet's disease in southern Italy. *Clin Exp Rheumatol* **31**, 28–31 (2013).
75. Kappen, J. H. *et al.* Behçet's disease, hospital-based prevalence and manifestations in the Rotterdam area. *Neth. J. Med.* **73**, 471–477 (2015).
76. Kanecki, K. *et al.* Behçet disease: a rare systemic vasculitis in Poland. *Polish Arch. Intern. Med.* **127**, 652–656 (2017).
77. Behçet., G. N. para o E. da D. de & Crespo, J. Behçet's disease - a national casuistic. *Med Int* **4**, 225–232 (1997).
78. González-Gay, M. A., García-Porrúa, C., Brañas, F., López-Lázaro, L. & Olivieri, I. Epidemiologic and clinical aspects of Behçet's disease in a defined area of Northwestern Spain, 1988-1997. *J. Rheumatol.* **27**, 703–707 (2000).
79. Mohammad, A., Mandl, T., Sturfelt, G. & Segelmark, M. Incidence, prevalence and clinical characteristics of Behçet's disease in southern Sweden.

*Rheumatology* **52**, 304–310 (2013).

80. Villiger, R. A., Stefanski, A.-L., Grobéty, V., Adler, S. & Villiger, P. M. Behçet's syndrome: clinical presentation and prevalence in Switzerland. *Swiss Med. Wkly.* **149**, w20072 (2019).
81. Thomas, T. *et al.* Epidemiology, morbidity and mortality in Behçet's disease: a cohort study using The Health Improvement Network (THIN). *Rheumatology* **59**, 2785–2795 (2020).
82. Gheita, T. A. *et al.* Behçet's disease in Egypt: a multicenter nationwide study on 1526 adult patients and review of the literature. *Clin. Rheumatol.* **38**, 2565–2575 (2019).
83. Al-Rawi, Z. S. & Neda, A. H. Prevalence of Behçet's disease among Iraqis. *Adv. Exp. Med. Biol.* **528**, 37–41 (2003).
84. Moghimi, N. *et al.* WHO-ILAR COPCORD study (stage 1, urban study) in Sanandaj, Iran. *Clin. Rheumatol.* **34**, 535–543 (2015).
85. Krause, I. *et al.* Prevalence and clinical aspects of Behçet's disease in the north of Israel. *Clin. Rheumatol.* **26**, 555–560 (2007).
86. Madanat, W. Y. *et al.* The prevalence of Behçet's disease in the north of Jordan: a hospital-based epidemiological survey. *Clin. Exp. Rheumatol.* **35 (Suppl 108)**, 51–54 (2017).
87. Mousa, A. R. A. M., Marafie, A. A., Rifai, K. M. Al, Dajani, A. I. & Mukhtar, M. M. Behçet's Disease in Kuwait, Arabia: A report of 29 Cases and a Review. *Scand. J. Rheumatol.* **15**, 310–332 (2009).
88. Chaaya, M. *et al.* High burden of rheumatic diseases in Lebanon: a COPCORD study. *Int. J. Rheum. Dis.* **15**, 136–143 (2012).
89. al-Dalaan, A. N. *et al.* Behçet's disease in Saudi Arabia. *J. Rheumatol.* **21**, 658–661 (1994).
90. Azizlerli, G. *et al.* Prevalence of Behçet's disease in Istanbul, Turkey. *Int. J. Dermatol.* **42**, 803–806 (2003).
91. Tunes, R. S., Anjos, T. C., Martins, G. B., Barreto, E. R. M. & Santiago, M. B. Prevalence of Behçet's syndrome in patients with recurrent aphthous ulcerations in Brazil. *Rheumatol. Int.* **29**, 875–878 (2009).
92. Fernández-Ávila, D. G., Rincón-Riaño, D. N., Bernal-Macías, S., Dávila, J. M. G. & Rosselli, D. Prevalence and demographic characteristics of Behçet disease in Colombia: data from the national health registry 2012-2016. *Rheumatol. Int.* **40**, 17–20 (2020).
93. Muruganandam, M. *et al.* Characteristics of Behçet's Disease in the American Southwest. *Semin. Arthritis Rheum.* **49**, 296–302 (2019).
94. Li, R. *et al.* Epidemiology of eight common rheumatic diseases in China: a large-scale cross-sectional survey in Beijing. *Rheumatology* **51**, 721–729 (2012).
95. Nakae, K. *et al.* Recent epidemiological features of Behçet's disease in Japan. in *Behçet's disease*. 145–151 (1993).
96. Balt, J. *et al.* Clinical features of Behçet's disease in Mongolia: a multicenter study. *Clin. Rheumatol.* **39**, 2697–2706 (2020).
97. Jun, J.-B. *et al.* Significant Decline in the Incidence of Behçet's Disease in South Korea: A Nationwide Population-Based Study (2004-2017). *Arthritis Care Res.* <https://doi.org/10.1002/acr.24408> (2020).
98. Yu, K.-H., See, L.-C., Kuo, C.-F., Chou, I.-J. & Chou, M.-J. Prevalence and incidence in patients with autoimmune rheumatic diseases: a nationwide population-based study in Taiwan. *Arthritis Care Res.* **65**, 244–250 (2013).
